# Supplementary material
Source: Research Square preprint supplement (doi:10.21203/rs.3.rs-9131260/v1)
Supplement: Supplementary file 2 [file 2da13316834d6c7fa488072e.docx]

**Interview guide – Simulation based training facilitators**

**Aim: Determine the effectiveness of simulation-based training for healthcare providers to function as facilitators in childbirth simulation.**

The questions concern how the course was perceived, the pedagogics and if the participants feel ready to become facilitators after the course.

1. What is your reflection about the simulation-based training workshop? How prepared are you to be a facilitator now?

- How did you experience the pedagogics of the training
- How did you experience the amount of time used
- How did you perceive the material used

1. How was the overall experience of undertaking the simulation-based training?

- What was easy?
- What was hard?

1. How will you use the knowledge from this simulation-based training clinically?
2. How will you use the knowledge from this training in the midwifery education programme?
3. How well prepared do you feel for your role as a facilitator?

- What do you need to feel comfortable in your role as facilitator?
- Could we have provided the training in a different way?

1. Will you be able to implement these simulation courses in your workplace?
